# Announcements

---

## Submission of the Heinrich Warner Prize 1991/1992

(1) The Heinrich Warner Prize will be granted every 2 years. The endowment of the submission for 1991/1992 will be DM 30,000.-.

The prize is for outstanding scientific clinical or experimental research in the field of urological oncology which has not yet been published.

(2) The prize winner will be invited to present his paper at the Symposium of the Heinrich Warner Stiftung held every 2 years in Hamburg (FRG). A summary will be published together with the summaries of the other presentations at the symposium.

(3) Applications should be sent in English or German. The board of the foundation has no objection to the publication of the work after having been sent to the Heinrich Warner Stiftung even if it is published before the prize has been granted. Several authors can participate jointly.

(4) The paper has to be forwarded anonymously together with a letter until 31st March, 1992 to

Heinrich Warner Stiftung  
Ernst-Jürgen Mellin  
Magdalenenstrasse 7  
D-W-2000 Hamburg 13 (FRG)

mentioning the author, his address and his profession.

## European Association of Urology and European Board of Urology Scholarships

The European Association of Urology and the European Board of Urology will award *three* scholarships for research in urology. Each scholarship will be awarded for 1 year, starting on July 1, 1992, at a maximum of 33.000 ECU at any appropriate institution in the world.

For more information please contact:  
The European Board of Urology Education Committee  
PO Box 25285  
NL-3001 HG Rotterdam (The Netherlands)

## Experimentelle Urologie

Wuppertal, October 16-17, 1992

J.W. Thüroff, D. Jocham, K. Miller

Application:  
Prof. Dr. J.W. Thüroff  
Urologische Klinik  
Klinikum Barmen  
Heusnerstrasse 40  
D-W-5600 Wuppertal 2 (FRG)
